# Supplementary material
Source: Springer Nature journal article supplement (https://www.springermedizin.de/resource/supplementary/12887_2012_681_MOESM2_ESM.pdf/9475532)

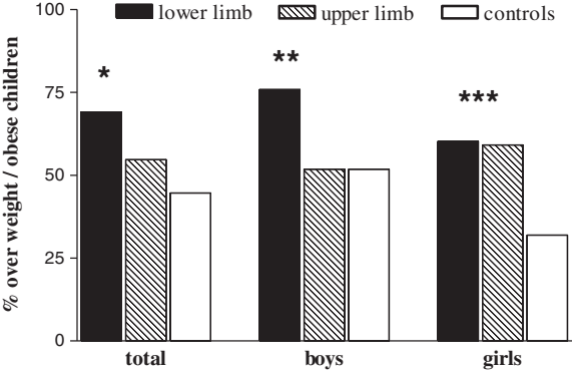

Supplement: MOESM2 [file 9475532]
